# Supplementary material
Source: MDPI journal article supplement (https://www.mdpi.com/2304-6740/11/4/169)
Supplement: s1 [file s1]

## Supporting information

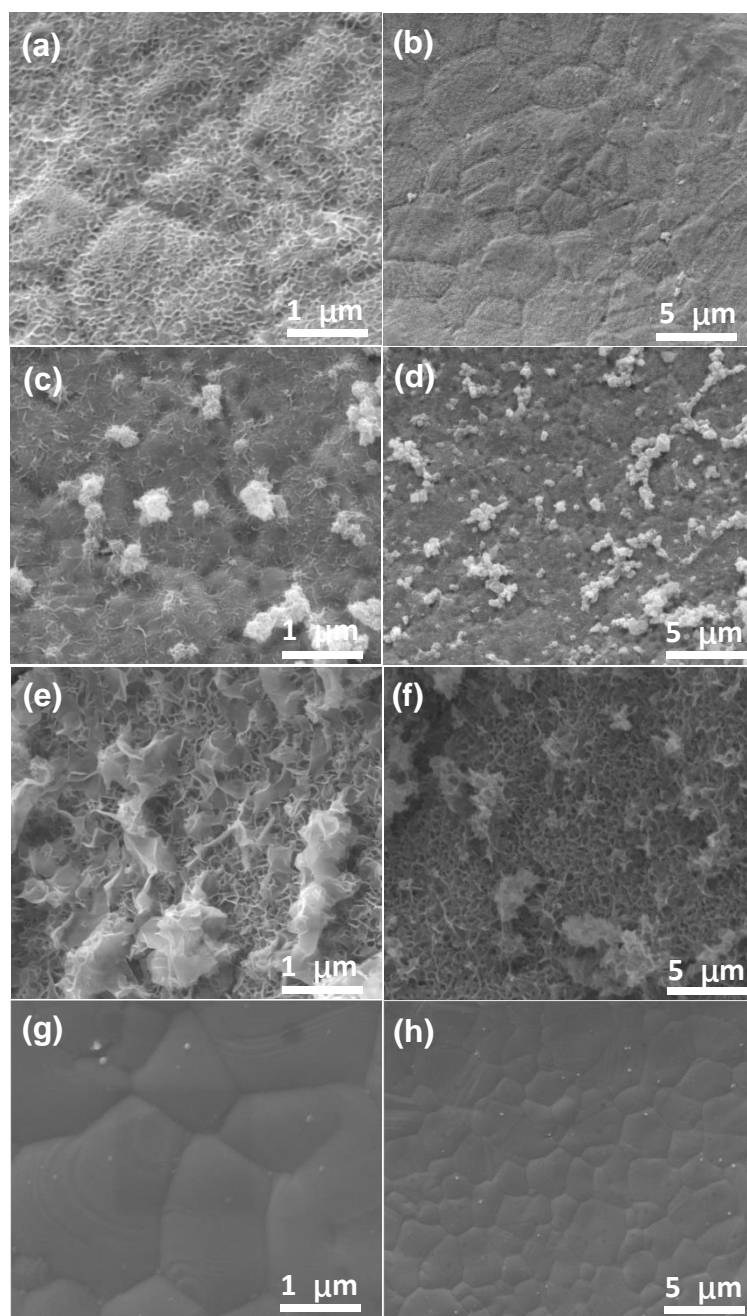

Figure S1. SEM images of (a,b) Fe(BPDC)-1, (c,d) Fe(BPDC)-2, (e,f) Fe(BPDC)-3, (g,h) sample without iron source.

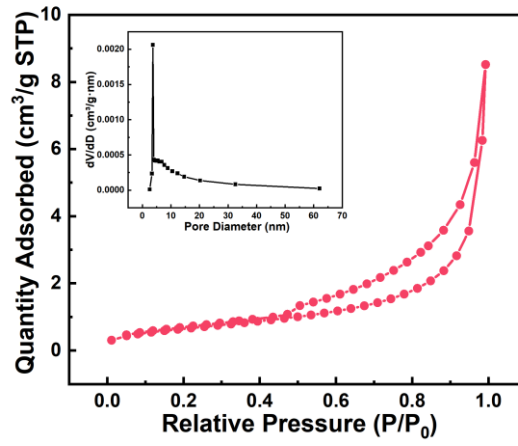

Figure S2. BET analysis of the Fe(BPDC)-3

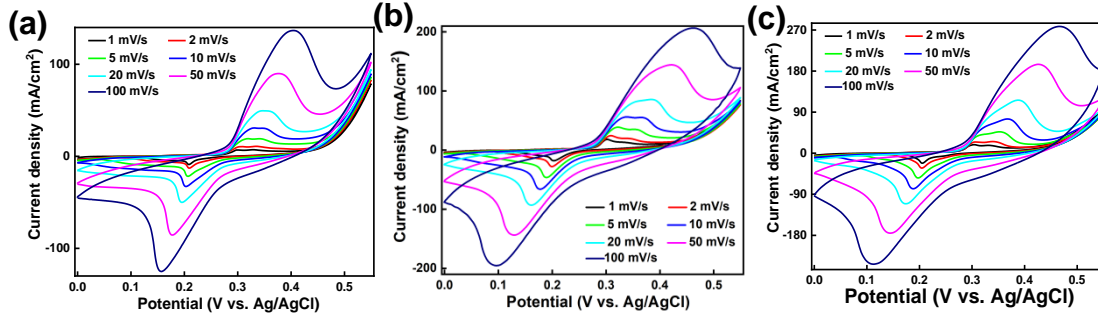

Figure S3. CV curves of (a) Fe(BPDC)-1, (b) Fe(BPDC)-2, (c) Fe(BPDC)-3 electrode.

| Materials                                  | electrolyte | Potential window | specific capacity                                 | cycle performance | Year[Reference] |
|--------------------------------------------|-------------|------------------|---------------------------------------------------|-------------------|-----------------|
| Fe(TATB)(Tipa)(H <sub>2</sub> O)<br>(FeSC) | 6 M KOH     | 0-0.5 V          | 409.2 C/g at 1 A/g                                |                   | 2021[50]        |
| Fe-MOF/Ni(OH) <sub>2</sub>                 | 3 M KOH     | 0-0.7 V          | 188 mAh/g at 1 A/g                                |                   | 2021[51]        |
| Ni-Co-Fe-S<br>(NFCs-NS)                    | 6M KOH      | 0-0.6 V          | 1156 C/g at 2 A/g                                 | 92.9%<br>(10000)  | 2020[52]        |
| Fe-Co-S/NF                                 | 1 M KOH     | 0-0.6 V          | 2695 F/g at 1 A/g                                 | 84% (1000)        | 2019[53]        |
| u-hl-<br>MOF/NRSs                          | 3 M KOH     | 0-0.6 V          | 13.14 F/cm <sup>2</sup> at 2 mA/cm <sup>2</sup> , | 96.5% (10000)     | 2020[54]        |
| Ni-MOF@NCS/NF                              | 2 M KOH     | 0-0.6 V          | 8.7C/cm <sup>2</sup> at 1 mA/cm <sup>2</sup>      | 89.7% (5000)      | 2021[55]        |
| Fe(BPDC)                                   | 3 M KOH     | 0-0.55 V         | 17.54 F/cm <sup>2</sup> at 1mV/s                  | 127% (10000)      | This work       |

Table S1 Comparison of Fe(BPDC)-3 with published MOFs cathode

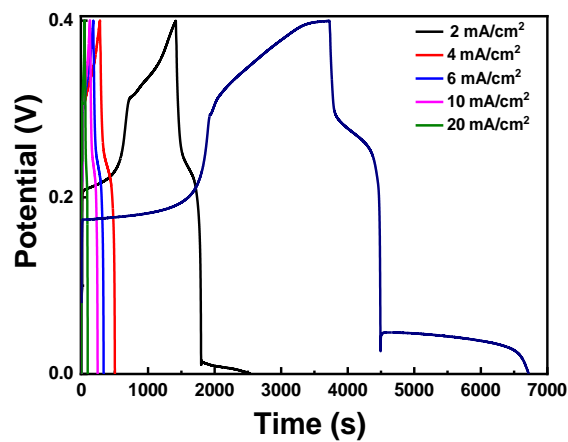

Figure S4. GCD curves at different current densities of Fe(BPDC)-3.

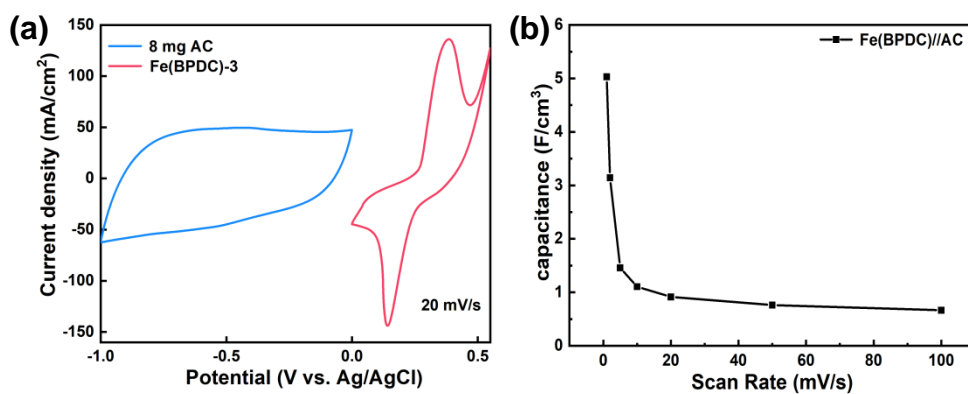

Figure S5. (a) Comparison of CV curves at 20mV/s of Fe(BPDC)-3 and AC. (b) Capacitance of Fe(BPDC)//AC.
